# Supplementary material
Source: HighWire-hosted journal article supplement (https://bmjopen.bmj.com/content/9/8/e030147)
Supplement: inline-supplementary-material-3 [file inline-supplementary-material-3.pdf]

---

| Author | Title | Initial studies included from full text screening (prior to reviewer discussion) |                 |                 |
|--------|-------|----------------------------------------------------------------------------------|-----------------|-----------------|
|        |       | Reviewer 1 (PD)                                                                  | Reviewer 2 (JA) | Reviewer 3 (EA) |

Conclusion of discussion

Decision

Response received from author

Outcome

Key

|                                                       |                                                                                                                                                                                                                               |
|-------------------------------------------------------|-------------------------------------------------------------------------------------------------------------------------------------------------------------------------------------------------------------------------------|
| <b>Unanimous consensus inclusion</b>                  |                                                                                                                                                                                                                               |
| <b>Majority consensus inclusion</b>                   |                                                                                                                                                                                                                               |
| <b>Minority consensus inclusion / contact author*</b> | *In event where either there is not majority consensus inclusion or exclusion i.e. one reviewer wishes to include and at least one other wishes to seek further information, or two reviewers wish to seek futher information |
| <b>Majority consensus exclusion**</b>                 | ** = Reasons for all excluded studies are given in exclusion form                                                                                                                                                             |
| <b>Unanimous consensus exclusion**</b>                | ** = Reasons for all excluded studies are given in exclusion form                                                                                                                                                             |
| <b>Unanimous consensus contact author</b>             |                                                                                                                                                                                                                               |
| <b>? = Contact author***</b>                          | ** = Reasons for all instances of contacting the study author for clarification or futher information to assess eligibility are outlined in contact author form                                                               |

✓ = Included  
x = Excluded
